# Supplementary material
Source: PubMed Central journal article supplement (PMC9060371)
Supplement: mmc1.pdf [file mmc1.pdf]

1 **SARS-CoV-2 and other airborne respiratory viruses in**  
2 **outdoor aerosols in three Swiss cities before and during**  
3 **the first wave of the COVID-19 pandemic**

4 Yile Tao<sup>1,2</sup>, Xiaole Zhang<sup>1,2</sup>, Guangyu Qiu<sup>1,2</sup>, Martin Spillmann<sup>1,2</sup>, Zheng Ji<sup>3</sup>, and Jing Wang<sup>1,2,\*</sup>

5 1. Institute of Environmental Engineering, ETH Zurich, Zurich 8093, Switzerland;

6 2. Laboratory for Advanced Analytical Technologies, Empa, Swiss Federal Laboratories for  
7 Materials Science and Technology, Dübendorf 8600, Switzerland

8 3. School of Geography and Tourism, Shaanxi Normal University, Xi'an 710119, China

9 \*Correspondence: jing.wang@ifu.baug.ethz.ch

10  
11 **Abstract**

12 **Caused by the SARS-CoV-2 virus, Coronavirus disease 2019 (COVID-19) has been affecting the**  
13 **world since the end of 2019. While virus-laden particles have been commonly detected and studied**  
14 **in the aerosol samples from indoor healthcare settings, studies are scarce on air surveillance of the**  
15 **virus in outdoor non-healthcare environments, including the correlations between SARS-CoV-2**  
16 **and other respiratory viruses, between viruses and environmental factors, and between viruses and**  
17 **human behavior changes due to the public health measures against COVID-19. Therefore, in this**  
18 **study, we collected airborne particulate matter (PM) samples from November 2019 to April 2020**  
19 **in Bern, Lugano, and Zurich. Among 14 detected viruses, influenza A, HCoV-NL63, HCoV-HKU1,**  
20 **and HCoV-229E were abundant in air. SARS-CoV-2 and enterovirus were moderately common,**  
21 **while the remaining viruses occurred only in low concentrations. SARS-CoV-2 was detected in**  
22 **PM<sub>10</sub> (PM below 10 µm) samples of Bern and Zurich, and PM<sub>2.5</sub> (PM below 2.5 µm) samples of**  
23 **Bern which exhibited a concentration positively correlated with the local COVID-19 case number.**  
24 **The concentration was also correlated with the concentration of enterovirus which raised the**  
25 **concern of coinfection. The estimated COVID-19 infection risks of an hour exposure at these two**  
26 **sites were generally low but still cannot be neglected. Our study demonstrated the potential**  
27 **functionality of outdoor air surveillance of airborne respiratory viruses, especially at**  
28 **transportation hubs and traffic arteries.**

29 **Keywords: SARS-CoV-2, COVID-19, airborne respiratory virus, bioaerosol, air pollution,**  
30 **surveillance**

## Supplementary Tables

Table 1. Primers list of this study

| Target virus | Classification | Primer name | Primer sequence (5'-3')           | Size(bp) | T <sub>m</sub> (°C) <sup>a</sup> | Reference |     |     |     |     |    |     |     |     |
|--------------|----------------|-------------|-----------------------------------|----------|----------------------------------|-----------|-----|-----|-----|-----|----|-----|-----|-----|
| Influenza A  | Influenza A    | InfA-F      | GACCRATCCTGTACCTCTGAC             | 106      | 55                               | [1]       |     |     |     |     |    |     |     |     |
|              |                | InfA-R      | AGGGCATTYTGACAAAKCGTCTA           |          |                                  |           |     |     |     |     |    |     |     |     |
| Influenza B  | Influenza B    | InfB-F      | TCCTCAAYTCACTCTTCGAGCG            | 102      |                                  | 55        | [2] |     |     |     |    |     |     |     |
|              |                | InfB-R      | CGGTGCTCTTGACCAAATTGG             |          |                                  |           |     |     |     |     |    |     |     |     |
| HCoV-NL63    | Coronavirus    | Cov-NL63-F  | GTTCTGATAAGGCACCATATAGG           | 143      |                                  |           | 55  | [3] |     |     |    |     |     |     |
|              |                | Cov-NL63-R  | TTTAGGAGGCAAATCAACACG             |          |                                  |           |     |     |     |     |    |     |     |     |
| HCoV-OC43    | Coronavirus    | CoV-OC43-F  | CATACTCTGACGGTCACAATAATA          | 100      |                                  |           |     |     | 55  | [3] |    |     |     |     |
|              |                | CoV-OC43-R  | ACCTTAGCAACAGTCATATAAGC           |          |                                  |           |     |     |     |     |    |     |     |     |
| HCoV-HKU1    | Coronavirus    | CoV-HKU1-F  | TCCTACTAYTCAAGAAGCTATCC           | 147      |                                  |           |     |     |     |     | 55 | [3] |     |     |
|              |                | CoV-HKU1-R  | AATGAACGATTATTGGGTCCAC            |          |                                  |           |     |     |     |     |    |     |     |     |
| HCoV-229E    | Coronavirus    | CoV-229E-F  | CATACTATCAACCCATTCAACAAG          | 137      | 55                               |           |     |     |     |     |    |     | [3] |     |
|              |                | CoV-229E--R | CACGGCAACTGTCATGTATT              |          |                                  |           |     |     |     |     |    |     |     |     |
| SARS-CoV-2   | Coronavirus    | ORF1ab-F    | CCCTGTGGGTTTTACTTAA               | 129      |                                  | 55        |     |     |     |     |    |     |     | [4] |
|              |                | ORF1ab-R    | ACGATTGTGCATCAGCTGA               |          |                                  |           |     |     |     |     |    |     |     |     |
| RSVA         | RSV            | RSVA1-F     | AGATCAACTTCTGTCATCCAGCAA          | 56       |                                  |           | 60  | [5] |     |     |    |     |     |     |
|              |                | RSVA1-R     | ATTGATACTCCTAATTATGATGTGC         |          |                                  |           |     |     |     |     |    |     |     |     |
| RSVB         | RSV            | RSVB1-F     | AAGATGCAAATCATAAATTCACAGGA        | 61       |                                  |           |     | 60  | [5] |     |    |     |     |     |
|              |                | RSVB1-R     | CACTATAAAGATACTTAAAGATGCTGGATATCA |          |                                  |           |     |     |     |     |    |     |     |     |

|             |             |            |                            |     |    |     |
|-------------|-------------|------------|----------------------------|-----|----|-----|
| Enterovirus | Enterovirus | 417EAVs    | CATCTCTTGCTTTGCTCCTTAG     | 134 | 55 | [3] |
|             |             | 418EVAas   | AGCCGCACCTTCACATTG         |     |    |     |
| Rhinovirus  | Enterovirus | 1039HRVs   | GACATGGTGTGAAGATCT         | 142 |    |     |
|             |             | 1037HRVas  | ACACGGACACCCAAAGTAGT       |     |    |     |
| HPIV1       | HPIV        | 1101PIV1s  | AAAAACTTAGGGTTAAAGACAATCCA | 164 |    |     |
|             |             | 1102PIV1as | GCCAGATGTRTGTCYTTCTGCTGGT  |     |    |     |
| HPIV2       | HPIV        | 231PIV2s   | CCATTACCTAAGTGATGGAA       | 113 |    |     |
|             |             | 232PIV2as  | CGTGGCATAATCTTCTTTTT       |     |    |     |
| HPIV3       | HPIV        | 1106PIV3s  | CAGGAAGCATTGTRTCATCTGT     | 154 |    |     |
|             |             | 1107PIV3as | ATAGTGTGTAATGCAGCTYGT      |     |    |     |
| HPIV4       | HPIV        | 264PIV4    | CCTGGAGTCCCATCAAAAGT       | 200 |    |     |
|             |             | 1071PIV4as | GCATCTATACGAACRCCTGCT      |     |    |     |
| HMPV        | HMPV        | 342MPVs    | CATGCCCACTATAAAAGGTCAG     | 170 |    |     |
|             |             | 343MPVas   | CACCCCAGTCTTTCTTGAAA       |     |    |     |

<sup>a</sup> T<sub>m</sub>: melting temperature for PCR and SYBR Green-based qPCR.

Table 2. Viral parameters for risk estimation

| Target virus | $\alpha$ | N50      | Unit of $\alpha$ & N50 | Reference of $\alpha$ & N50 | $\lambda$ | Reference of $\lambda$ | copies per PFU <sup>b</sup> | Reference of copies per PFU <sup>b</sup> | TCID50 <sup>a</sup> per PFU <sup>b</sup> | Reference of TCID50 <sup>a</sup> per PFU <sup>b</sup> |
|--------------|----------|----------|------------------------|-----------------------------|-----------|------------------------|-----------------------------|------------------------------------------|------------------------------------------|-------------------------------------------------------|
| Influenza A  | 0.38841  | 490325.5 | TCID50a                | [6]                         | 5.10%     | [7]                    | 23044.91                    | [8-10]                                   | 0.695                                    | [11]                                                  |
| Influenza    | /        | /        | /                      | /                           | 3.20%     | [7]                    | 28840.32                    | [8]                                      | 0.7                                      | [12]                                                  |

|              |        |        |                  |      |       |         |       |      |     |      |
|--------------|--------|--------|------------------|------|-------|---------|-------|------|-----|------|
| B            |        |        |                  |      |       |         |       |      |     |      |
| HCoV<br>229E | 1.2337 | 10.805 | TCID50a          | [13] |       |         | 30000 | [9]  | 0.7 | [12] |
| SARS         | 665.14 | 281.46 | PFU <sup>b</sup> | [13] | 6.67% | [14-19] | 300   | [20] | 0.7 | [12] |

<sup>a</sup> TCID50: 50% Tissue Culture Infectious Dose; <sup>b</sup> PFU: Plaque Forming Unit.

Table 3. The P values of Shapiro-Wilk test on different viral abundances of different cities during different time periods

| city   | time                   | PM  | influe<br>nza A | influe<br>nza B | HCoV-<br>NL63 | HCoV-<br>OC43 | HCoV-<br>HKU1 | HCoV-<br>229E | Entero<br>virus | Rhino<br>virus | HP<br>IV<br>1 | HP<br>IV<br>2 | HP<br>IV<br>3 | HP<br>IV<br>4 | H<br>MP<br>V | SARS-<br>CoV-2 |
|--------|------------------------|-----|-----------------|-----------------|---------------|---------------|---------------|---------------|-----------------|----------------|---------------|---------------|---------------|---------------|--------------|----------------|
| Bern   | All                    | 2.5 | 0.6029          | 1.00E-05 ***    | 0.4419        | 5.55E-05 ***  | 0.1793        | 0.244         | 5.57E-05 ***    | 1.16E-05 ***   | 1.21E-06 ***  | 0***          | 1.21E-06 ***  | 0***          | 0***         | 6.13E-05 ***   |
| Lugano | All                    | 2.5 | 0.4065          | 0.0002236 **    | 0.08221       | 1.07E-05 ***  | 0.6253        | 0.0006191 *** | 0.0004424 **    | 1.21E-06 ***   | 0***          | 0***          | 1.21E-06 ***  | 1.21E-06 ***  | 0.00071      | 0***           |
| Zurich | All                    | 2.5 | 0.4822          | 0.0001049 **    | 0.929         | 1.21E-06 ***  | 0.08476       | 0.002751 ***  | 1.04E-05 ***    | 1.02E-05 ***   | 0***          | 1.21E-06 ***  | 1.02E-05 ***  | 1.21E-06 ***  | 1.16E-05 *** | 0***           |
| Bern   | All                    | 10  | 0.8997          | 1.30E-05 ***    | 0.96          | 0***          | 0.0005875 *** | 0.001356 **   | 0.0003849 *     | 0***           | 0***          | 0***          | 0***          | 1.21E-06 ***  | 1.13E-05 *** | 0.02083 *      |
| Lugano | All                    | 10  | 0.03711 *       | 1.21E-06 ***    | 0.4865        | 1.21E-06 ***  | 0.4681        | 0.7937        | 1.21E-06 ***    | 1.21E-06 ***   | 0***          | 0***          | 1.38E-05 ***  | 0.00040       | 0***         | 1.08E-05 ***   |
| Zurich | All                    | 10  | 0.3521          | 0.0006612 **    | 0.4255        | 0***          | 0.9998        | 0.0005499 *** | 0.000811 ***    | 1.11E-05 ***   | 0***          | 0***          | 0***          | 0***          | 1.21E-06 *** | 0.4831         |
| Bern   | Before the<br>outbreak | 2.5 | 0.4632          | 0***            | 0.4535        | 4.14E-06 ***  | 0.6671        | 0.8346        | 0.0004199 *     | 0.0004566 **   | 4.14E-06 ***  | 0***          | 0***          | 0***          | 0***         | 0***           |

|        |                     |     |        |                  |        |             |          |              |                  |                  |             |             |             |                |                |              |
|--------|---------------------|-----|--------|------------------|--------|-------------|----------|--------------|------------------|------------------|-------------|-------------|-------------|----------------|----------------|--------------|
| Lugano | Before the outbreak | 2.5 | 0.7454 | 0.0006417**<br>* | 0.258  | 0***        | 0.4595   | 0.02275*     | 0.003697**       | 0***             | 0***        | 0***        | 4.14E-06    | 4.14E-06       | 0.00978**      | 0***         |
| Zurich | Before the outbreak | 2.5 | 0.9518 | 0.001059**       | 0.732  | 4.14E-06*** | 0.4489   | 0.9291       | 0.0003321**<br>* | 4.14E-06***      | 0***        | 4.14E-06*** | 4.14E-06*** | 0***           | 4.14E-06***    | 0***         |
| Bern   | Before the outbreak | 10  | 0.6149 | 4.14E-06***      | 0.6273 | 0***        | 0.02903* | 0.02931*     | 0.0007818**<br>* | 0***             | 0***        | 0***        | 0***        | 0***           | 4.14E-06***    | 0.117        |
| Lugano | Before the outbreak | 10  | 0.3063 | 0***             | 0.2759 | 0***        | 0.3483   | 0.09701      | 0***             | 4.14E-06***      | 0***        | 0***        | 4.14E-06    | 0.00340**<br>3 | 0***           | 0.0003663*** |
| Zurich | Before the outbreak | 10  | 0.3688 | 0.002867**       | 0.7027 | 0***        | 0.9873   | 5.49E-05***  | 0.01141*         | 0.0004037**<br>* | 0***        | 0***        | 0***        | 0***           | 0***           | 0.7508       |
| Bern   | During the outbreak | 2.5 | 0.6931 | 0.007058**       | 0.9446 | 0.008731**  | 0.3796   | 0.7823       | 0.000131***      | 0***             | 0***        | 0***        | 0.000131*** | 0***           | 0***           | 0.02807*     |
| Lugano | During the outbreak | 2.5 | 0.6357 | 0.007561**       | 0.7703 | 0.009401**  | 0.409    | 0.1993       | 0.01105*         | 0.000131**<br>*  | 0***        | 0***        | 0***        | 0***           | 0.00265**<br>7 | 0***         |
| Zurich | During the outbreak | 2.5 | 0.336  | 0.000131***      | 0.6018 | 0***        | 0.1494   | 0.02353*     | 0***             | 0.000131**<br>*  | 0***        | 0***        | 0.000131*** | 0.000131***    | 0.000131***    | 0***         |
| Bern   | During the outbreak | 10  | 0.8754 | 0.000131***      | 0.3817 | 0***        | 0.8507   | 0.0007339*** | 0.01402*         | 0***             | 0***        | 0***        | 0***        | 0.000131***    | 0.000131***    | 0.2146       |
| Lugano | During the outbreak | 10  | 0.8299 | 0.000131***      | 0.6221 | 0.000131*** | 0.5943   | 0.6857       | 0.000131***      | 0***             | 0***        | 0***        | 0.000131*** | 0.0094**       | 0***           | 0***         |
| Zurich | During the outbreak | 10  | 0.8285 | 0.01123*<br>*    | 0.2424 | 0***        | 0.8864   | 0***         | 0.0004411**<br>* | 0***             | 0.000131*** | 0***        | 0***        | 0***           | 0.000131***    | 0.2306       |
| Bern   | Before the lockdown | 2.5 | 0.8783 | 3.22E-07***      | 0.5609 | 3.22E-07*** | 0.1868   | 0.5878       | 0.0002499**<br>* | 2.46E-05***      | 3.22E-07*** | 0***        | 0***        | 0***           | 0***           | 3.22E-07***  |
| Lugano | Before the lockdown | 2.5 | 0.4375 | 0.0003679**<br>* | 0.7127 | 0***        | 0.4453   | 0.004384**   | 0.0003015**<br>* | 0***             | 0***        | 0***        | 3.22E-07*** | 3.22E-07***    | 0.00264**<br>5 | 0***         |

|        |                                         |     |         |              |        |             |            |              |              |              |             |             |              |              |              |             |
|--------|-----------------------------------------|-----|---------|--------------|--------|-------------|------------|--------------|--------------|--------------|-------------|-------------|--------------|--------------|--------------|-------------|
| Zurich | Before the lockdown                     | 2.5 | 0.5959  | 4.34E-05***  | 0.7462 | 3.22E-07*** | 0.8296     | 0.945        | 1.94E-05***  | 3.22E-07***  | 0***        | 3.22E-07*** | 3.22E-07***  | -            | 3.22E-07***  | 0***        |
| Bern   | Before the lockdown                     | 10  | 0.5541  | 3.22E-07***  | 0.7847 | 0***        | 0.002127** | 0.004739**   | 4.98E-05***  | 0***         | 0***        | 0***        | 0***         | 0***         | 3.22E-07***  | 0.08695     |
| Lugano | Before the lockdown                     | 10  | 0.02335 | 3.22E-07***  | 0.4392 | 3.22E-07*** | 0.5742     | 0.1276       | 0***         | 3.22E-07***  | 0***        | 0***        | 3.74E-05***  | 0.0002845*** | 0***         | 2.09E-05*** |
| Zurich | Before the lockdown                     | 10  | 0.7655  | 0.0002499*** | 0.5254 | 0***        | 0.9453     | 0.0005753*** | 0.003315**   | 2.24E-05***  | 3.22E-07*** | 0***        | 0***         | 0***         | 0***         | 0.2742      |
| Bern   | After the lockdown                      | 2.5 | 0.7654  | < 2.2E-16*** | 0.5891 | 0.06488     | 0.2176     | 0.4454       | 0***         | 0***         | 0***        | 0***        | < 2.2E-16*** | 0***         | 0***         | 0.2361      |
| Lugano | After the lockdown                      | 2.5 | 0.6269  | < 2.2E-16*** | 0.7895 | 0.08186     | 0.09639    | 0.1493       | 0.1207       | < 2.2E-16*** | 0***        | 0***        | 0***         | 0***         | 0.4379       | 0***        |
| Zurich | After the lockdown                      | 2.5 | 0.744   | < 2.2E-16*** | 0.3012 | 0***        | 0.2272     | < 2.2E-16*** | 0***         | < 2.2E-16*** | 0***        | 0***        | < 2.2E-16*** | < 2.2E-16*** | < 2.2E-16*** | 0***        |
| Bern   | After the lockdown                      | 10  | 0.1671  | < 2.2E-16*** | 0.1689 | 0***        | 0.6754     | 0.07263      | < 2.2E-16*** | 0***         | 0***        | 0***        | 0***         | < 2.2E-16*** | < 2.2E-16*** | 0.02188*    |
| Lugano | After the lockdown                      | 10  | 0.8287  | 0***         | 0.3374 | 0***        | 0.9513     | 0.716        | < 2.2E-16*** | 0***         | 0***        | 0***        | 0***         | 0.08184      | 0***         | 0***        |
| Zurich | After the lockdown                      | 10  | 0.498   | 0.1246       | 0.2275 | 0***        | 0.8774     | 0***         | 0.5637       | 0***         | 0***        | 0***        | 0***         | 0***         | < 2.2E-16*** | 0.5536      |
| Bern   | During semesters                        | 2.5 | 0.8468  | 2.07E-05***  | 0.6203 | 2.07E-05*** | 0.8354     | 0.7334       | 0.008712**   | 0.00245**    | 2.07E-05*** | 0***        | 0***         | 0***         | 0***         | 2.07E-05*** |
| Bern   | During semesters                        | 10  | 0.5512  | 0***         | 0.4276 | 0***        | 0.0524     | 0.01376*     | 0.0002939*** | 0***         | 0***        | 0***        | 0***         | 0***         | 0***         | 0.3968      |
| Bern   | During the semester before the outbreak | 2.5 | 0.8328  | 0***         | 0.5634 | 0.001241**  | 0.7476     | 0.9569       | 0.05075      | 0.05851      | 0.001241**  | 0***        | 0***         | 0***         | 0***         | 0***        |

|        |                                            |     |          |              |        |             |         |          |             |      |      |      |             |             |              |             |
|--------|--------------------------------------------|-----|----------|--------------|--------|-------------|---------|----------|-------------|------|------|------|-------------|-------------|--------------|-------------|
| Bern   | During the semester before the outbreak    | 10  | 0.6395   | 0***         | 0.3003 | 0***        | 0.5527  | 0.08235  | 0.01693     | 0*** | 0*** | 0*** | 0***        | 0***        | 0***         | 0.8989      |
| Bern   | During the vacation                        | 2.5 | 0.6905   | 0***         | 0.6556 | 0***        | 0.2596  | 0.3614   | 0***        | 0*** | 0*** | 0*** | 0***        | 0***        | 0***         | 0***        |
| Bern   | During the vacation                        | 10  | 0.7954   | < 2.2E-16*** | 0.1282 | 0***        | 0.3737  | 0.7313   | 0.5396      | 0*** | 0*** | 0*** | 0***        | 0***        | < 2.2E-16*** | 0.1024      |
| Bern   | During the vacation and after the lockdown | 2.5 | 0.3502   | 2.07E-05***  | 0.6577 | 0.001733**  | 0.2278  | 0.3906   | 0***        | 0*** | 0*** | 0*** | 0***        | 0***        | 0***         | 0.003032**  |
| Bern   | During the vacation and after the lockdown | 10  | 0.9732   | 0.003879**   | 0.9132 | 0***        | 0.6465  | 0.02669* | 0.01932*    | 0*** | 0*** | 0*** | 2.07E-05*** | 2.07E-05*** | 0.00226**    | 0.09709     |
| Lugano | During semesters                           | 2.5 | 0.8464   | 0.002949**   | 0.3797 | 2.07E-05*** | 0.1734  | 0.02182* | 2.07E-05*** | 0*** | 0*** | 0*** | 0***        | 2.07E-05*** | 0.002168**   | 0***        |
| Lugano | During semesters                           | 10  | 0.01969* | 2.07E-05***  | 0.4588 | 0***        | 0.4358  | 0.01087* | 0***        | 0*** | 0*** | 0*** | 0.004894**  | 0***        | 0***         | 2.07E-05*** |
| Lugano | During the semester before the outbreak    | 2.5 | 0.8296   | 0.001241     | 0.7156 | 0***        | 0.09189 | 0.1688   | 0.001241**  | 0*** | 0*** | 0*** | 0***        | 0.001241**  | 0.001241**   | 0***        |
| Lugano | During the semester before the outbreak    | 10  | 0.2707   | 0***         | 0.2771 | 0***        | 0.8729  | 0.4485   | 0***        | 0*** | 0*** | 0*** | 0.001241    | 0***        | 0***         | 0.001241**  |
| Lugano | During the vacation                        | 2.5 | 0.8745   | < 2.2E-16*** | 0.2476 | 0***        | 0.4902  | 0.3236   | 0.2213      | 0*** | 0*** | 0*** | 0***        | 0***        | 0.946        | 0***        |

|        |                                            |     |              |             |             |             |         |          |              |              |      |             |              |              |              |              |
|--------|--------------------------------------------|-----|--------------|-------------|-------------|-------------|---------|----------|--------------|--------------|------|-------------|--------------|--------------|--------------|--------------|
| Lugano | During the vacation                        | 10  | 0.3173       | 0***        | 2.07E-05*** | 0***        | 0.8482  | 0.5707   | 0***         | < 2.2E-16*** | 0*** | 0***        | 0***         | < 2.2E-16*** | 0***         | < 2.2E-16*** |
| Lugano | During the vacation and after the lockdown | 2.5 | 0.442        | 0.002066**  | 0.3381      | 0***        | 0.5196  | 0.0015** | 0.008225**   | 2.07E-05***  | 0*** | 0***        | 0***         | 0***         | 0.4424       | 0***         |
| Lugano | During the vacation and after the lockdown | 10  | 0.07977      | 0***        | 0.3819      | 0.001843    | 0.4767  | 0.2679   | 2.07E-05***  | 2.07E-05***  | 0*** | 0***        | 0***         | 0.01045*     | 0***         | 2.07E-05***  |
| Zurich | During semesters                           | 2.5 | 0.9063       | 0.006817**  | 0.5081      | 2.07E-05*** | 0.5067  | 0.9979   | 2.07E-05***  | 0***         | 0*** | 2.07E-05*** | 0***         | 0***         | 0***         | 0***         |
| Zurich | During semesters                           | 10  | 0.7179       | 0.008736**  | 0.6947      | 0***        | 0.3366  | 0.004809 | 0.01745*     | 0***         | 0*** | 2.07E-05*** | 0***         | 0***         | 0***         | 0.09721      |
| Zurich | During the semester before the outbreak    | 2.5 | 0.9702       | 0.2425      | 0.985       | 0.001241**  | 0.2249  | 0.9213   | 0.001241**   | 0***         | 0*** | 0.001241**  | 0***         | 0***         | 0***         | 0***         |
| Zurich | During the semester before the outbreak    | 10  | 0.2687       | 0.01059*    | 0.8494      | 0***        | 0.9341  | 0.395    | 0.06889      | 0***         | 0*** | 0***        | 0***         | 0***         | 0***         | 0.3915       |
| Zurich | During the vacation                        | 2.5 | 0.1948       | 0***        | 0.3194      | 0***        | 0.9115  | 0.5735   | < 2.2E-16*** | < 2.2E-16*** | 0*** | 0***        | < 2.2E-16*** | 0***         | < 2.2E-16*** | < 2.2E-17*** |
| Zurich | During the vacation                        | 10  | 0.0004639*** | 0***        | 0.2139      | 0***        | 0.5491  | 0.1346   | < 2.2E-16*** | 0.1218       | 0*** | 0***        | 0***         | 0***         | 0***         | 0.9895       |
| Zurich | During the vacation and after the lockdown | 2.5 | 0.741        | 2.07E-05*** | 0.2662      | 0***        | 0.06451 | 0.01593* | 2.07E-05***  | 0.001563***  | 0*** | 0***        | 0.001571**   | 2.07E-05***  | 0.002481**   | 0.002481**   |



|        |                                            |    |           |           |        |      |         |            |            |           |      |      |      |      |             |        |
|--------|--------------------------------------------|----|-----------|-----------|--------|------|---------|------------|------------|-----------|------|------|------|------|-------------|--------|
| Zurich | During the vacation and after the lockdown | 10 | 0.00226** | 0.00214** | 0.1792 | 0*** | 0.09527 | 0.002213** | 0.009149** | 0.00212** | 0*** | 0*** | 0*** | 0*** | 2.07E-05*** | 0.2695 |
|--------|--------------------------------------------|----|-----------|-----------|--------|------|---------|------------|------------|-----------|------|------|------|------|-------------|--------|

\*: P<0.05; \*\*: P<0.01; \*\*\*: P<0.001.

Table 4. The average of different viral abundances and P values of post-hoc analysis of Friedman test on them (Friedman chi-squared = 581.52, df = 13, p-value < 2.2e-16\*\*\*)

|             | Entero virus | HCoV-229E   | HCoV-HKU1   | HCoV-NL63   | HCoV-OC43   | HMPV        | HPIV1       | HPIV2       | HPIV3       | HPIV4       | influenza A | influenza B | Rhinovirus | SARS-CoV-2 |
|-------------|--------------|-------------|-------------|-------------|-------------|-------------|-------------|-------------|-------------|-------------|-------------|-------------|------------|------------|
| Average     | 1.155723     | 3.418171    | 1.657353    | 3.06306     | 0.327067    | 0.065831    | 0.031146    | 0.214062    | 0.365354    | 0.493949    | 2.5603      | 0.705678    | 0.291623   | 1.022463   |
| HCoV-229E   | 0.8799       |             |             |             |             |             |             |             |             |             |             |             |            |            |
| HCoV-HKU1   | 2.00E-13***  | 1.80E-08*** | -           | -           | -           | -           | -           | -           | -           | -           | -           | -           | -          | -          |
| HCoV-NL63   | 4.80E-09***  | 0.00016***  | 0.9482      | -           | -           | -           | -           | -           | -           | -           | -           | -           | -          | -          |
| HCoV-OC43   | 0.06333      | 3.50E-05*** | < 2e-16***  | 1.40E-13*** | -           | -           | -           | -           | -           | -           | -           | -           | -          | -          |
| HMPV        | 0.1696       | 0.00021***  | 6.80E-14*** | 1.20E-13*** | 1           | -           | -           | -           | -           | -           | -           | -           | -          | -          |
| HPIV1       | 0.00232**    | 2.10E-07*** | < 2e-16***  | 1.30E-13*** | 0.9998      | 0.9929      | -           | -           | -           | -           | -           | -           | -          | -          |
| HPIV2       | 0.00145**    | 1.10E-07*** | < 2e-16***  | 1.40E-13*** | 0.9992      | 0.9848      | 1           | -           | -           | -           | -           | -           | -          | -          |
| HPIV3       | 0.01693**    | 4.10E-06*** | < 2e-16***  | 1.10E-13*** | 1           | 0.9999      | 1           | 1           | -           | -           | -           | -           | -          | -          |
| HPIV4       | 0.1153       | 0.0001***   | 2.80E-14*** | 1.00E-13*** | 1           | 1           | 0.9979      | 0.9948      | 1           | -           | -           | -           | -          | -          |
| influenza A | 0.00112**    | 0.3667      | 0.01053**   | 0.62137     | 2.20E-12*** | 3.30E-11*** | 1.30E-13*** | 1.20E-13*** | 2.70E-13*** | 1.10E-11*** | -           | -           | -          | -          |
| influenza B | 0.7793       | 0.01177**   | 1.40E-13*** | 1.30E-13*** | 0.9912      | 0.9997      | 0.6287      | 0.5468      | 0.9188      | 0.9984      | 2.20E-08*** | -           | -          | -          |
| Rhinovirus  | 0.04953*     | 2.30E-05*** | < 2e-16***  | 1.20E-13*** | 1           | 1           | 0.9999      | 0.9997      | 1           | 1           | 1.20E-12*** | 0.9848      | -          | -          |

SARS-  
CoV-2

0.9999      0.4361      1.10E-13\*\*\*      4.40E-11\*\*\*      0.3339      0.5917      0.02948\*\*      0.02021\*\*      0.1351      0.4798      4.60E-05\*\*\*      0.9898      0.2849

\*: P<0.05; \*\*: P<0.01; \*\*\*: P<0.001.

Table 5. The average of viral abundances in different PM and cities and their P values of paired T test or Randomization test, and post-hoc analysis of Friedman test on them

|             |                           | Bern       | Lugano      | Zurich      | Friedman test | P value<br>post-hoc analysis of Friedman test |                         |                           |
|-------------|---------------------------|------------|-------------|-------------|---------------|-----------------------------------------------|-------------------------|---------------------------|
|             |                           |            |             |             |               | between Bern and Lugano                       | between Bern and Zurich | between Lugano and Zurich |
| Influenza A | P value                   |            |             |             |               |                                               |                         |                           |
|             | PM2.5                     | 2.315968   | 3.304902    | 3.243323    | 8.84E-05***   | 0.00013***                                    | 0.00313**               | 0.69278                   |
|             | PM10                      | 1.974187   | 2.139601    | 2.383821    | 0.004828**    | 0.2317                                        | 0.0031**                | 0.2317                    |
|             | paired T test             | 0.006769** | -           | 3.12E-06*** | -             | -                                             | -                       | -                         |
|             | paired Randomization test | -          | 7.00E-04*** | -           | -             | -                                             | -                       | -                         |
| Influenza B | P value                   |            |             |             |               |                                               |                         |                           |
|             | PM2.5                     | 0.5659977  | 1.035394    | 0.7934723   | 0.7376        | 0.87                                          | 0.99                    | 0.91                      |
|             | PM10                      | 0.430493   | 0.3187717   | 1.089942    | 0.2444        | 0.91                                          | 0.75                    | 0.5                       |
|             | paired Randomization test | 0.7496     | 0.2527      | 0.6302      | -             | -                                             | -                       | -                         |
| HCoV-NL63   | P value                   |            |             |             |               |                                               |                         |                           |
|             | PM2.5                     | 3.13066    | 3.416032    | 3.294861    | 0.3385        | 0.33                                          | 0.91                    | 0.56                      |
|             | PM10                      | 2.656905   | 2.900023    | 2.979881    | 0.02778*      | 0.232                                         | 0.022*                  | 0.564                     |

|             |         |                           |            |            |            |              |          |           |        |
|-------------|---------|---------------------------|------------|------------|------------|--------------|----------|-----------|--------|
|             | P value | paired T test             | 0.003571** | 0.004107** | 0.004004** | -            | -        | -         | -      |
| HCoV-OC43   |         | PM2.5                     | 0.8723385  | 0.2646062  | 0.2538026  | 0.4493       | 0.81     | 0.81      | 1      |
|             |         | PM10                      | 0          | 0.5716539  | 0          | 0.1353       | 0.81     | 1         | 0.81   |
|             | P value | paired Randomization test | 0.2497     | 0.4987     | 1          | -            | -        | -         | -      |
| HCoV-HKU1   |         | PM2.5                     | 3.295556   | 3.759511   | 3.781532   | 0.0004307*** | 0.0062** | 0.0007*** | 0.8134 |
|             |         | PM10                      | 3.2456     | 3.171228   | 3.255597   | 0.1054       | 1        | 0.16      | 0.16   |
|             | P value | paired Randomization test | 0.7372     | -          | -          | -            | -        | -         | -      |
| HCoV-229E   |         | PM2.5                     | 1.870468   | 1.531872   | 1.620951   | 0.2636       | 0.69     | 0.69      | 0.23   |
|             |         | PM10                      | 1.401285   | 2.347188   | 1.172357   | 0.0004063    | 0.001    | 0.9122    | 0.0044 |
|             | P value | paired Randomization test | 0.1873     | 0***       | 0.2159     | -            | -        | -         | -      |
| Enterovirus |         | PM2.5                     | 0.6761924  | 1.114479   | 0.3526199  | 0.4095       | 0.87     | 0.87      | 0.56   |
|             |         | PM10                      | 2.343837   | 0.2632303  | 2.18398    | 0.005028**   | 0.022*   | 0.994     | 0.029* |
|             | P value | paired Randomization test | 0.0104*    | 0.0623     | 0.009**    | -            | -        | -         | -      |
| Rhinovirus  |         | PM2.5                     | 0.3958501  | 0.2435959  | 0.4426857  | 0.926        | 0.98     | 0.99      | 0.99   |
|             |         | PM10                      | 0          | 0.2139692  | 0.4536341  | 0.1561       | 0.98     | 0.75      | 0.87   |

|       |         |                           |           |           |           |              |        |       |       |
|-------|---------|---------------------------|-----------|-----------|-----------|--------------|--------|-------|-------|
|       | p value | paired Randomization test | 0.498     | 0.4965    | 0.8677    | -            | -      | -     | -     |
| HPIV1 |         | PM2.5                     | 0.1955926 | 0         | 0         | 0.3679       | 0.95   | 0.95  | 1     |
|       |         | PM10                      | 0         | 0         | 0.199395  | 0.3679       | 1      | 0.95  | 0.95  |
|       | p value | paired Randomization test | 1         | 2         | 1         | -            | -      | -     | -     |
| HPIV2 |         | PM2.5                     | 0         | 0         | 0.1868781 | 0.3679       | 1      | 0.95  | 0.95  |
|       |         | PM10                      | 0         | 0         | 0         | NA           | 1      | 1     | 1     |
|       | p value | paired Randomization test | 2         | 2         | 1         | -            | -      | -     | -     |
| HPIV3 |         | PM2.5                     | 0         | 0.2162443 | 0.4374321 | 0.3679       | 0.95   | 0.81  | 0.95  |
|       |         | PM10                      | 0.2475997 | 0.3830936 | 0         | 0.3679       | 0.95   | 0.95  | 0.81  |
|       | p value | paired Randomization test | 1         | 0.7524    | 0.4949    | -            | -      | -     | -     |
| HPIV4 |         | PM2.5                     | 0         | 0.2442832 | 0.2499287 | 0.6065       | 0.95   | 0.95  | 1     |
|       |         | PM10                      | 0.2525512 | 1.445361  | 0         | 0.008652**   | 0.33   | 0.98  | 0.23  |
|       | p value | paired Randomization test | 1         | 0.0651    | 1         | -            | -      | -     | -     |
| HMPV  |         | PM2.5                     | 0         | 2.050006  | 0.4663806 | 0.0005322*** | 0.022* | 0.912 | 0.064 |
|       |         | PM10                      | 0.2875642 | 0         | 0.1597438 | 0.3679       | 0.81   | 0.95  | 0.95  |

|            |         |                           |             |           |             |              |            |         |           |
|------------|---------|---------------------------|-------------|-----------|-------------|--------------|------------|---------|-----------|
|            | P value | paired Randomization test | 0.5035      | 0.0073**  | 0.494       | -            | -          | -       | -         |
| SARS-CoV-2 |         | PM2.5                     | 0.4448611   | 0         | 0           | 0.04979*     | 0.63       | 0.63    | 1         |
|            |         | PM10                      | 2.712063    | 0.2988824 | 2.678971    | 0.0001135*** | 0.00031*** | 0.91224 | 0.00151** |
|            | P value | paired Randomization test | 8.00E-04*** | 0.5033    | 8.00E-04*** | -            | -          | -       | -         |

\*: P<0.05; \*\*: P<0.01; \*\*\*: P<0.001.

Table 6. The Spearman's correlation coefficient (r) of viral co-occurrence in PM2.5

|               | Influenz<br>a A | Influenz<br>a B | HCoV-<br>NL63 | HCoV-<br>OC43 | HCoV-<br>HKU1 | HCoV-<br>229E | Enterov<br>irus | Rhinovi<br>rus | HPIV1    | HPIV2 | HPIV3 | HPIV4 | HMPV |
|---------------|-----------------|-----------------|---------------|---------------|---------------|---------------|-----------------|----------------|----------|-------|-------|-------|------|
| Influenza B   | 0.2833          |                 |               |               |               |               |                 |                |          |       |       |       |      |
| HCoV-<br>NL63 | 0.3656*         | 0.3141*         |               |               |               |               |                 |                |          |       |       |       |      |
| HCoV-<br>OC43 | -0.02654        | 0.1424          | 0.2375        |               |               |               |                 |                |          |       |       |       |      |
| HCoV-<br>HKU1 | 0.7315*         | 0.2406          | 0.2561        | -0.09631      |               |               |                 |                |          |       |       |       |      |
| HCoV-<br>229E | -0.03992        | 0.2765          | 0.2422        | 0.1011        | 0.1223        |               |                 |                |          |       |       |       |      |
| Enterovirus   | -0.05656        | 0.1957          | 0.2833        | -0.0244       | 0.1100        | -0.04412      |                 |                |          |       |       |       |      |
| Rhinovirus    | -0.1104         | -0.03658        | 0.03125       | 0.04484       | -0.07105      | -0.005568     | 0.2913          |                |          |       |       |       |      |
| HPIV1         | -0.2197         | -0.09628        | -0.2685       | -0.06764      | -0.2847       | -0.02442      | 0.2576          | 0.3923*        |          |       |       |       |      |
| HPIV2         | -0.1058         | 0.2033          | -0.1058       | -0.06764      | 0.1058        | 0.2687        | 0.1751          | -0.06764       | -0.02857 |       |       |       |      |

|            |         |         |           |          |          |           |          |          |          |          |          |          |          |
|------------|---------|---------|-----------|----------|----------|-----------|----------|----------|----------|----------|----------|----------|----------|
| HPIV3      | 0.1605  | -0.1715 | 0.06120   | -0.1205  | 0.08859  | -0.2216   | -0.01598 | -0.1205  | -0.05091 | -0.05091 |          |          |          |
| HPIV4      | 0.08298 | -0.1381 | -0.1883   | -0.09702 | 0.002917 | -0.3736   | -0.1478  | -0.09702 | -0.04098 | -0.04098 | 0.4023*  |          |          |
| HMPV       | 0.5245* | 0.05186 | 0.1385    | -0.2439  | 0.4449*  | -0.001957 | 0.2386   | -0.03252 | -0.1030  | -0.1030  | -0.1836  | 0.06054  |          |
| SARS-CoV-2 | -0.2582 | -0.1715 | -0.001074 | 0.5053*  | -0.3087  | 0.1042    | -0.1836  | -0.1205  | -0.05091 | -0.05091 | -0.09071 | -0.07302 | -0.18357 |

\*:  $|r| > 0.3$ .

Table 7. The P value of viral co-occurrence in PM2.5

|               | Influenz<br>a A | Influenz<br>a B | HCoV-<br>NL63 | HCoV-<br>OC43 | HCoV-<br>HKU1 | HCoV-<br>229E | Enterov<br>irus | Rhinovi<br>rus | HPIV1      | HPIV2      | HPIV3       | HPIV4      | HMPV |
|---------------|-----------------|-----------------|---------------|---------------|---------------|---------------|-----------------|----------------|------------|------------|-------------|------------|------|
| Influenza B   | 9.4084E-02      |                 |               |               |               |               |                 |                |            |            |             |            |      |
| HCoV-<br>NL63 | 2.8490E-02*     | 6.2106E-02      |               |               |               |               |                 |                |            |            |             |            |      |
| HCoV-<br>OC43 | 8.7790E-01      | 4.0743E-01      | 1.6299E-01    |               |               |               |                 |                |            |            |             |            |      |
| HCoV-<br>HKU1 | 4.0118E-07***   | 1.5743E-01      | 1.3163E-01    | 5.7634E-01    |               |               |                 |                |            |            |             |            |      |
| HCoV-<br>229E | 8.1718E-01      | 1.0255E-01      | 1.5461E-01    | 5.5749E-01    | 4.7719E-01    |               |                 |                |            |            |             |            |      |
| Enterovirus   | 7.4320E-01      | 2.5277E-01      | 9.4112E-02    | 8.8771E-01    | 5.2300E-01    | 7.9836E-01    |                 |                |            |            |             |            |      |
| Rhinovirus    | 5.2142E-01      | 8.3225E-01      | 8.5644E-01    | 7.9511E-01    | 6.8050E-01    | 9.7429E-01    | 8.4707E-02      |                |            |            |             |            |      |
| HPIV1         | 1.9801E-01      | 5.7645E-01      | 1.1337E-01    | 6.9507E-01    | 9.2329E-02    | 8.8757E-01    | 1.2937E-01      | 1.7950E-02*    |            |            |             |            |      |
| HPIV2         | 5.3927E-01      | 2.3446E-01      | 5.3927E-01    | 6.9507E-01    | 5.3927E-01    | 1.1313E-01    | 3.0691E-01      | 6.9507E-01     | 8.6862E-01 |            |             |            |      |
| HPIV3         | 3.4965E-01      | 3.1712E-01      | 7.2289E-01    | 4.8382E-01    | 6.0741E-01    | 1.9397E-01    | 9.2631E-01      | 4.8382E-01     | 7.6810E-01 | 7.6810E-01 |             |            |      |
| HPIV4         | 6.3043E-01      | 4.2189E-01      | 2.7137E-01    | 5.7351E-01    | 9.8653E-01    | 2.4786E-02*   | 3.8975E-01      | 5.7351E-01     | 8.1243E-01 | 8.1243E-01 | 1.5011E-02* |            |      |
| HMPV          | 1.0248E-03**    | 7.6388E-01      | 4.2037E-01    | 1.5168E-01    | 6.5461E-03**  | 9.9096E-01    | 1.6110E-01      | 8.5064E-01     | 5.4988E-01 | 5.4988E-01 | 2.8385E-01  | 7.2576E-01 |      |

SARS-  
CoV-2

1.2834E-01 3.1712E-01 9.9504E-01 1.6699E-03\*\* 6.6965E-02 5.4524E-01 2.8385E-01 4.8382E-01 7.6810E-01 7.6810E-01 5.9881E-01 6.7215E-01 2.8385E-01

\*: P<0.05; \*\*: P<0.01; \*\*\*: P<0.001.

Table 8. The Spearman's correlation coefficient (r) of viral co-occurrence in PM10

|                | Influenz<br>a A | Influenz<br>a B | HCoV-<br>NL63 | HCoV-<br>OC43 | HCoV-<br>HKU1 | HCoV-<br>229E | Enterov<br>irus | Rhinovi<br>rus | HPIV1    | HPIV2 | HPIV3     | HPIV4   | HMPV   |
|----------------|-----------------|-----------------|---------------|---------------|---------------|---------------|-----------------|----------------|----------|-------|-----------|---------|--------|
| Influenza B    | 0.3331*         |                 |               |               |               |               |                 |                |          |       |           |         |        |
| HCoV-<br>NL63  | 0.3709*         | 0.01397         |               |               |               |               |                 |                |          |       |           |         |        |
| HCoV-<br>OC43  | 0.2764          | -0.1283         | 0.3624*       |               |               |               |                 |                |          |       |           |         |        |
| HCoV-<br>HKU1  | 0.3544*         | 0.08364         | 0.2180        | 0.1562        |               |               |                 |                |          |       |           |         |        |
| HCoV-<br>229E  | -0.3281*        | -0.06523        | -0.05344      | 0.05815       | -0.5033*      |               |                 |                |          |       |           |         |        |
| Enterovirus    | 0.1497          | 0.08042         | 0.04306       | -0.0001732    | 0.1901        | -0.3547       |                 |                |          |       |           |         |        |
| Rhinovirus     | -0.06550        | -0.15933        | 0.1449        | -0.07301      | -0.02040      | 0.2759        | -0.1498         |                |          |       |           |         |        |
| HPIV1          | 0.1546          | -0.08942        | 0.04068       | -0.04098      | 0.1383        | -0.2214       | 0.2174          | -0.05091       |          |       |           |         |        |
| HPIV2          | NA              | NA              | NA            | NA            | NA            | NA            | NA              | NA             | NA       |       |           |         |        |
| HPIV3          | 0.1659          | 0.3994*         | -0.07570      | -0.07301      | -0.1117       | -0.002164     | -0.2789         | -0.09071       | -0.05090 | NA    |           |         |        |
| HPIV4          | -0.001189       | -0.2353         | -0.2512       | 0.2504        | -0.1871       | 0.2366        | -0.4119         | -0.1340        | -0.07519 | NA    | 0.1120    |         |        |
| HMPV           | -0.009127       | 0.2818          | -0.001074     | -0.07301      | 0.003221      | -0.1683       | 0.3036*         | -0.09070       | -0.05090 | NA    | -0.09070  | -0.1340 |        |
| SARS-<br>CoV-2 | 0.2174          | 0.2569          | -0.06335      | -0.3067       | 0.2049        | -0.6294       | 0.5875*         | 0.002171       | 0.1233   | NA    | -0.006512 | -0.4146 | 0.1612 |

\*:  $|r| > 0.3$ ; NA: not available.

Table 9. The P value of viral co-occurrence in PM10

|                | Influenz<br>a A | Influenz<br>a B | HCoV-<br>NL63 | HCoV-<br>OC43 | HCoV-<br>HKU1 | HCoV-<br>229E | Enterov<br>irus | Rhinovi<br>rus | HPIV1  | HPIV2 | HPIV3  | HPIV4     | HMPV   |
|----------------|-----------------|-----------------|---------------|---------------|---------------|---------------|-----------------|----------------|--------|-------|--------|-----------|--------|
| Influenza B    | 0.04709*        |                 |               |               |               |               |                 |                |        |       |        |           |        |
| HCoV-<br>NL63  | 0.02594*        | 0.9355          |               |               |               |               |                 |                |        |       |        |           |        |
| HCoV-<br>OC43  | 0.1026          | 0.45560         | 0.02986*      |               |               |               |                 |                |        |       |        |           |        |
| HCoV-<br>HKU1  | 0.03392*        | 0.6277          | 0.2015        | 0.3629        |               |               |                 |                |        |       |        |           |        |
| HCoV-<br>229E  | 0.05070         | 0.7055          | 0.7569        | 0.7362        | 0.001756**    |               |                 |                |        |       |        |           |        |
| Enterovirus    | 0.3836          | 0.6410          | 0.8031        | 0.9992        | 0.2667        | 0.03382*      |                 |                |        |       |        |           |        |
| Rhinovirus     | 0.7043          | 0.3533          | 0.3989        | 0.6721        | 0.9060        | 0.1033        | 0.3833          |                |        |       |        |           |        |
| HPIV1          | 0.3680          | 0.6040          | 0.8138        | 0.8124        | 0.4211        | 0.1944        | 0.2028          | 0.7681         |        |       |        |           |        |
| HPIV2          | NA              | NA              | NA            | NA            | NA            | NA            | NA              | NA             | NA     |       |        |           |        |
| HPIV3          | 0.3335          | 0.01580*        | 0.6608        | 0.6721        | 0.5167        | 0.9900        | 0.09952         | 0.5988         | 0.7681 | NA    |        |           |        |
| HPIV4          | 0.9945          | 0.1671          | 0.1395        | 0.1409        | 0.2744        | 0.1648        | 0.01255*        | 0.4360         | 0.6630 | NA    | 0.5153 |           |        |
| HMPV           | 0.9579          | 0.09592         | 0.9950        | 0.6721        | 0.9851        | 0.3266        | 0.07188         | 0.5988         | 0.7681 | NA    | 0.5988 | 0.4360    |        |
| SARS-<br>CoV-2 | 0.2028          | 0.1303          | 0.7136        | 0.068890      | 0.2306        | 0.00003913**  | 0.0001649***    | 0.9900         | 0.4735 | NA    | 0.9699 | 0.011939* | 0.3477 |

\*:  $P < 0.05$ ; \*\*:  $P < 0.01$ ; \*\*\*:  $P < 0.001$ ; NA: not available.

Table 10. The Spearman's correlation coefficient (r) of the co-occurrence of viruses and environmental factors in PM2.5



|                         | O <sub>3</sub> | NO <sub>2</sub> | SO <sub>2</sub> | CO         | PM <sub>10</sub> | PM <sub>2.5</sub> | EC in PM <sub>2.5</sub> | PNC      | NMVOC    | NO <sub>x</sub> | T        | PREC      | RAD       | New COVID-19 Cases |
|-------------------------|----------------|-----------------|-----------------|------------|------------------|-------------------|-------------------------|----------|----------|-----------------|----------|-----------|-----------|--------------------|
| Influenza A             | 0.3663*        | -0.3498*        | 0.1078          | -0.3644*   | -0.1079          | 0.02368           | -0.53967*               | -0.3896* | 0.1136   | -0.5506*        | 0.5030*  | -0.1295   | 0.2703    | 0.2566             |
| Influenza B             | 0.1669         | -0.07006        | 0.1667          | -0.04164   | 0.06997          | -0.02065          | -0.04806                | -0.2263  | 0.1849   | -0.1073         | 0.2048   | -0.01929  | 0.1337    | 0.08543            |
| HCoV-NL63               | 0.2994         | -0.2512         | 0.06174         | -0.3350*   | 0.05628          | 0.02986           | -0.3062*                | -0.3983* | 0.07600  | -0.3423*        | 0.2574   | -0.1458   | 0.2039    | 0.1090             |
| HCoV-OC43               | 0.09716        | 0.02440         | 0.07615         | 0.1565     | 0.4259*          | 0.2829            | 0.1909                  | -0.1205  | 0.2231   | 0.07191         | -0.02183 | -0.2526   | 0.08175   | 0.1618             |
| HCoV-HKU1               | 0.2214         | -0.2262         | 0.2113          | -0.2189    | -0.03760         | 0.1346            | -0.4155*                | -0.1574  | 0.09828  | -0.4062*        | 0.2546   | -0.1349   | 0.1264    | 0.1613             |
| HCoV-229E               | 0.3517         | -0.2377         | -0.08976        | -0.2726    | -0.007350        | -0.03232          | -0.2151                 | -0.2975  | -0.1744  | -0.2471         | 0.1052   | -0.1947   | 0.3287*   | 0.1979             |
| Enterovirus             | 0.01809        | 0.1512          | 0.3085*         | 0.1442     | 0.03487          | 0.07497           | 0.1153                  | 0.06269  | 0.2588   | 0.07171         | -0.1173  | -0.05721  | -0.07334  | -0.1145            |
| Rhinovirus              | 0.1853         | -0.2204         | -0.3071*        | -0.2338    | -0.1429          | -0.2667           | -0.1828                 | 0.01664  | -0.3678* | -0.1541         | 0.1395   | 0.2008    | 0.08860   | -0.01482           |
| HPIV1                   | -0.05695       | 0.08949         | NA              | 0.1546     | -0.07509         | -0.1220           | 0.2197                  | 0.1958   | NA       | 0.2197          | -0.07322 | -0.008137 | -0.1058   | -0.1363            |
| HPIV2                   | -0.04068       | -0.008136       | -0.1958         | -0.05696   | -0.1609          | -0.07322          | -0.1709                 | NA       | -0.01513 | -0.04068        | -0.1709  | -0.07323  | -0.2359   | -0.1363            |
| HPIV3                   | -0.02523       | -0.08859        | -0.06656        | -0.07787   | -0.006172        | -0.1009           | -0.1871                 | -0.1355  | -0.09270 | -0.09986        | -0.01450 | 0.02255   | -0.006442 | 0.03058            |
| HPIV4                   | 0.006807       | -0.06288        | 0.03536         | -0.02821   | -0.05092         | -0.1352           | -0.1196                 | -0.01506 | -0.1343  | -0.1089         | 0.1037   | 0.09660   | -0.02723  | 0.1260             |
| HMPV                    | 0.2575         | -0.02559        | 0.5796*         | -0.0003261 | 0.1485           | 0.3240*           | -0.1024                 | -0.08341 | 0.4062*  | -0.2455         | 0.2384   | -0.2597   | 0.3014*   | 0.1948             |
| SARS-CoV-2              | 0.2529         | -0.06335        | NA              | -0.06525   | 0.3037*          | 0.09503           | 0.1122                  | -0.3010* | NA       | -0.01342        | 0.08375  | -0.1165   | 0.3012*   | 0.3358*            |
| O <sub>3</sub>          |                | -0.7411*        | -0.1922         | -0.7679*   | 0.1773           | -0.08777          | -0.6343*                | -0.7643* | -0.4875* | -0.8296*        | 0.7804*  | -0.2201   | 0.8994*   | 0.8617*            |
| NO <sub>2</sub>         |                |                 | 0.6461*         | 0.8395*    | 0.08209          | 0.2939            | 0.8233*                 | 0.9130*  | 0.7417*  | 0.8736*         | -0.7477* | -0.1149   | -0.5470*  | -0.7165*           |
| SO <sub>2</sub>         |                |                 |                 | 0.7323*    | 0.5233*          | 0.6522*           | 0.8139*                 | 0.9371*  | 0.8360*  | 0.4696*         | -0.1339  | -0.2805   | 0.03478   | -0.1699            |
| CO                      |                |                 |                 |            | 0.3354*          | 0.5075*           | 0.8805*                 | 0.8564*  | 0.8314*  | 0.8321*         | -0.6749* | -0.1086   | -0.5649*  | -0.6080*           |
| PM <sub>10</sub>        |                |                 |                 |            |                  | 0.8977*           | 0.4500*                 | -0.03308 | 0.24160  | 0.07319         | -0.01758 | -0.6426*  | 0.3028*   | 0.3434*            |
| PM <sub>2.5</sub>       |                |                 |                 |            |                  |                   | 0.4643*                 | 0.1609   | 0.4726*  | 0.1974          | -0.2098  | -0.6723*  | 0.1269    | 0.1002             |
| EC in PM <sub>2.5</sub> |                |                 |                 |            |                  |                   |                         | 0.8478*  | 0.8474*  | 0.8970*         | -0.6541* | -0.1019   | -0.4095*  | -0.4890*           |
| PNC                     |                |                 |                 |            |                  |                   |                         |          | 0.7684*  | 0.8504*         | -0.8348* | -0.2165   | -0.6878*  | -0.8260*           |
| NMVOC                   |                |                 |                 |            |                  |                   |                         |          |          | 0.6316*         | -0.2407  | -0.07776  | -0.3389*  | -0.4689*           |
| NO <sub>x</sub>         |                |                 |                 |            |                  |                   |                         |          |          |                 | -0.8510* | 0.02162   | -0.6690*  | -0.7433*           |

T  
PREC  
RAD

0.1169      0.6667\*      0.6940\*  
-0.32707\*      -0.2132  
0.8554\*

\*:  $|r| > 0.3$ ; NA: not available.

Table 11. The P value of the co-occurrence of viruses and environmental factors in PM2.5

|             | O <sub>3</sub> | NO <sub>2</sub> | SO <sub>2</sub> | CO          | PM <sub>10</sub> | PM <sub>2.5</sub> | EC in PM <sub>2.5</sub> | PNC        | NMVO C     | NO <sub>x</sub> | T            | PREC       | RAD        | New COVID-19 Cases |
|-------------|----------------|-----------------|-----------------|-------------|------------------|-------------------|-------------------------|------------|------------|-----------------|--------------|------------|------------|--------------------|
| Influenza A | 2.8012E-02*    | 3.6496E-02*     | 6.1602E-01      | 2.8869E-02* | 5.7035E-01       | 8.9096E-01        | 6.8166E-04***           | 5.9875E-02 | 5.9725E-01 | 5.0263E-04***   | 1.7692E-03** | 4.5164E-01 | 1.1089E-01 | 1.3090E-01         |
| Influenza B | 3.3072E-01     | 6.8472E-01      | 4.3622E-01      | 8.0945E-01  | 7.1332E-01       | 9.0487E-01        | 7.8073E-01              | 2.8757E-01 | 3.8711E-01 | 5.3340E-01      | 2.3092E-01   | 9.1107E-01 | 4.3696E-01 | 6.2032E-01         |
| HCoV-NL63   | 7.6117E-02     | 1.3942E-01      | 7.7443E-01      | 4.5829E-02* | 7.6767E-01       | 8.6276E-01        | 6.9332E-02              | 5.3915E-02 | 7.2412E-01 | 4.0975E-02*     | 1.2963E-01   | 3.9606E-01 | 2.3304E-01 | 5.2703E-01         |
| HCoV-OC43   | 5.7294E-01     | 8.8768E-01      | 7.2359E-01      | 3.6209E-01  | 1.8946E-02*      | 9.4527E-02        | 2.6471E-01              | 5.7486E-01 | 2.9461E-01 | 6.7685E-01      | 8.9944E-01   | 1.3725E-01 | 6.3550E-01 | 3.4574E-01         |
| HCoV-HKU1   | 1.9447E-01     | 1.8454E-01      | 3.2161E-01      | 1.9972E-01  | 8.4363E-01       | 4.3375E-01        | 1.1738E-02*             | 4.6265E-01 | 6.4777E-01 | 1.3969E-02*     | 1.3405E-01   | 4.3280E-01 | 4.6265E-01 | 3.4738E-01         |
| HCoV-229E   | 3.5423E-02*    | 1.6266E-01      | 6.7660E-01      | 1.0767E-01  | 9.6925E-01       | 8.5154E-01        | 2.0776E-01              | 1.5806E-01 | 4.1495E-01 | 1.4619E-01      | 5.4139E-01   | 2.5505E-01 | 5.0338E-02 | 2.4724E-01         |
| Enterovirus | 9.1659E-01     | 3.7856E-01      | 1.4242E-01      | 4.0145E-01  | 8.5487E-01       | 6.6387E-01        | 5.0303E-01              | 7.7106E-01 | 2.2199E-01 | 6.7768E-01      | 4.9549E-01   | 7.4031E-01 | 6.7077E-01 | 5.0610E-01         |
| Rhinovirus  | 2.7918E-01     | 1.9640E-01      | 1.4439E-01      | 1.7001E-01  | 4.5133E-01       | 1.1593E-01        | 2.8598E-01              | 9.3849E-01 | 7.7055E-02 | 3.6957E-01      | 4.1699E-01   | 2.4036E-01 | 6.0735E-01 | 9.3164E-01         |

|                         |               |               |               |             |               |               |               |               |               |               |               |               |            |             |
|-------------------------|---------------|---------------|---------------|-------------|---------------|---------------|---------------|---------------|---------------|---------------|---------------|---------------|------------|-------------|
| HPIV1                   | 7.4147E-01    | 6.0373E-01    | NA            | 3.6791E-01  | 6.9331E-01    | 4.7831E-01    | 1.9798E-01    | 3.5919E-01    | NA            | 1.9801E-01    | 6.7128E-01    | 9.6244E-01    | 5.3927E-01 | 4.2800E-01  |
| HPIV2                   | 8.1378E-01    | 9.6244E-01    | 3.5919E-01    | 7.4141E-01  | 3.9564E-01    | 6.7128E-01    | 3.1909E-01    | NA            | 9.4406E-01    | 8.1378E-01    | 3.1912E-01    | 6.7124E-01    | 1.6596E-01 | 4.2800E-01  |
| HPIV3                   | 8.8386E-01    | 6.0741E-01    | 7.5731E-01    | 6.5170E-01  | 9.7418E-01    | 5.5806E-01    | 2.7450E-01    | 5.2769E-01    | 6.6660E-01    | 5.6227E-01    | 9.3313E-01    | 8.9613E-01    | 9.7025E-01 | 8.5947E-01  |
| HPIV4                   | 9.6857E-01    | 7.1561E-01    | 8.6972E-01    | 8.7028E-01  | 7.8931E-01    | 4.3188E-01    | 4.8715E-01    | 9.4431E-01    | 5.3143E-01    | 5.2721E-01    | 5.4718E-01    | 5.7515E-01    | 8.7475E-01 | 4.6409E-01  |
| HMPV                    | 1.2946E-01    | 8.8224E-01    | 2.9932E-03**  | 9.9849E-01  | 4.3345E-01    | 5.3878E-02    | 5.5248E-01    | 6.9841E-01    | 4.8865E-02*   | 1.4904E-01    | 1.6137E-01    | 1.2605E-01    | 7.4082E-02 | 2.5498E-01  |
| SARS-CoV-2              | 1.3675E-01    | 7.1357E-01    | NA            | 7.0538E-01  | 1.0273E-01    | 5.8143E-01    | 5.1466E-01    | 1.5288E-01    | NA            | 9.3807E-01    | 6.2722E-01    | 4.9857E-01    | 7.4249E-02 | 4.5264E-02* |
| O <sub>3</sub>          | 2.3554E-07*** | 3.6832E-01    | 4.6035E-08*** | 3.4858E-01  | 6.1072E-01    | 3.2692E-05*** | 1.3735E-05*** | 1.5689E-02*   | 4.0163E-10*** | 1.9892E-08*** | 1.9708E-01    | 9.1187E-14*** | 1.50E-11   |             |
| NO <sub>2</sub>         |               | 6.4835E-04*** | 1.5788E-10*** | 6.6628E-01  | 8.1835E-02    | 7.0416E-10*** | 4.9324E-10*** | 3.3620E-05*** | 3.5672E-12*** | 1.5978E-07*** | 5.0443E-01    | 5.5651E-04*** | 8.88E-07   |             |
| SO <sub>2</sub>         |               |               | 4.7320E-05*** | 1.7893E-02* | 5.5353E-04*** | 1.3124E-06*** | 6.9932E-06*** | 3.6475E-07*** | 2.0610E-02*   | 5.3274E-01    | 1.8430E-01    | 8.7182E-01    | 4.27E-01   |             |
| CO                      |               |               |               | 7.0026E-02  | 1.5826E-03**  | 1.4492E-12*** | 9.3525E-08*** | 4.8408E-07*** | 3.1793E-10*** | 6.3316E-06*** | 5.2838E-01    | 3.3166E-04*** | 8.39E-05   |             |
| PM <sub>10</sub>        |               |               |               |             | 1.7923E-11*** | 1.2579E-02*   | 8.8988E-01    | 3.0479E-01    | 7.0070E-01    | 9.2656E-01    | 1.2882E-04*** | 1.0387E-01    | 6.32E-02   |             |
| PM <sub>2.5</sub>       |               |               |               |             |               | 4.3411E-03**  | 4.5269E-01    | 1.9697E-02*   | 2.4844E-01    | 2.1945E-01    | 7.1041E-06*** | 4.6081E-01    | 5.61E-01   |             |
| EC in PM <sub>2.5</sub> |               |               |               |             |               |               | 1.6970E-07*** | 1.7515E-07*** | 1.3330E-13*** | 1.5143E-05*** | 5.5408E-01    | 1.3121E-02*   | 2.47E-03   |             |

|                 |              |               |               |            |               |          |
|-----------------|--------------|---------------|---------------|------------|---------------|----------|
| PNC             | 3.5018E-03** | 1.4211E-07*** | 3.9327E-07*** | 3.0952E-01 | 2.0367E-04*** | 6.67E-07 |
| NMVOC           |              | 9.3246E-04*** | 2.5729E-01    | 7.1797E-01 | 1.0519E-01    | 2.08E-02 |
| NO <sub>x</sub> |              |               | 4.9008E-11*** | 9.0038E-01 | 8.1824E-06*** | 2.07E-07 |
| T               |              |               |               | 4.9724E-01 | 9.0252E-06*** | 2.68E-06 |
| PREC            |              |               |               |            | 5.1525E-02    | 2.12E-01 |
| RAD             |              |               |               |            |               | 3.04E-11 |

\*: P<0.05; \*\*: P<0.01; \*\*\*: P<0.001; NA: not available.

Table 12. The Spearman's correlation coefficient (r) of the co-occurrence of viruses and environmental factors in PM10

|             | O <sub>3</sub> | NO <sub>2</sub> | SO <sub>2</sub> | CO       | PM <sub>10</sub> | PM <sub>2.5</sub> | EC in PM <sub>2.5</sub> | PNC      | NMVOC    | NO <sub>x</sub> | T        | PREC      | RAD      | New COVID-19 Cases |
|-------------|----------------|-----------------|-----------------|----------|------------------|-------------------|-------------------------|----------|----------|-----------------|----------|-----------|----------|--------------------|
| Influenza A | 0.4085*        | -0.5792*        | -0.5104*        | -0.5539* | -0.1484          | -0.2999           | -0.6020*                | -0.4617* | -0.5940* | -0.5622*        | 0.4507*  | 0.0689    | 0.2281   | 0.3923*            |
| Influenza B | 0.09566        | -0.1027         | -0.2349         | -0.08172 | 0.2799           | 0.2912            | -0.1546                 | 0.03177  | -0.1946  | -0.1650         | 0.01291  | -0.4425*  | 0.05888  | 0.2021             |
| HCoV-NL63   | 0.3187*        | -0.4077*        | -0.1452         | -0.3180* | 0.03359          | -0.03655          | -0.4219*                | -0.4165* | -0.2953  | -0.4541*        | 0.2402   | 0.1337    | 0.1887   | 0.3724*            |
| HCoV-OC43   | 0.2924         | -0.3744*        | -0.004533       | -0.2420  | 0.1625           | 0.1339            | -0.2243                 | -0.4796* | -0.1129  | -0.3744*        | 0.3164*  | 0.1002    | 0.2577   | 0.3356*            |
| HCoV-HKU1   | 0.3359*        | -0.3699*        | -0.3339*        | -0.3018* | 0.02024          | -0.02188          | -0.2574                 | 0.05130  | -0.5438* | -0.2795         | 0.2010   | -0.0738   | 0.2613   | 0.3047*            |
| HCoV-229E   | -0.3520*       | 0.3668*         | 0.4631*         | 0.3269*  | -0.1220          | 0.1528            | 0.09754                 | 0.06701  | 0.6730*  | 0.1551          | -0.1821  | 0.0006486 | -0.3870* | -0.4511*           |
| Enterovirus | 0.1387         | -0.2517         | -0.5549*        | -0.2892  | -0.0630          | -0.2960           | -0.1157                 | -0.07427 | -0.5594* | -0.009905       | -0.0146  | 0.1409    | 0.0652   | 0.1370             |
| Rhinovirus  | -0.1911        | 0.2738          | 0.1740          | 0.2100   | NA               | 0.09342           | 0.06067                 | 0.3464*  | 0.1185   | 0.1772          | -0.3925* | -0.2795   | -0.1133  | -0.2428            |
| HPIV1       | 0.1220         | -0.2197         | -0.2560         | -0.2848  | -0.3111*         | -0.2847           | -0.2848                 | NA       | -0.2875  | -0.2197         | 0.1383   | 0.1546    | 0.05695  | 0.1000             |
| HPIV2       | NA             | NA              | NA              | NA       | NA               | NA                | NA                      | NA       | NA       | NA              | NA       | NA        | NA       | NA                 |
| HPIV3       | 0.03436        | 0.04671         | 0.2847          | 0.1332   | 0.2209           | 0.1836            | 0.09342                 | -0.1467  | 0.2755   | -0.0467         | 0.1063   | -0.05692  | 0.04725  | 0.1319             |

|                         |         |          |          |          |         |          |          |          |          |          |          |          |          |          |
|-------------------------|---------|----------|----------|----------|---------|----------|----------|----------|----------|----------|----------|----------|----------|----------|
| HPIV4                   | 0.1822  | -0.1897  | 0.3233*  | -0.07882 | 0.1573  | 0.1584   | -0.1479  | -0.4001* | 0.3081*  | -0.2849  | 0.4250*  | -0.1121  | 0.1762   | 0.1776   |
| HMPV                    | 0.07731 | -0.04778 | -0.1054  | 0.03088  | 0.1877  | 0.05745  | 0.006443 | -0.01723 | -0.3177* | -0.0387  | 0.03436  | -0.07598 | 0.2056   | 0.1925   |
| SARS-CoV-2              | 0.1207  | -0.1698  | -0.6990* | -0.2286  | 0.06201 | -0.1904  | -0.09000 | 0.1209   | -0.7265* | 0.04111  | -0.1852  | -0.09400 | 0.08950  | 0.1850   |
| O <sub>3</sub>          |         | -0.7411* | -0.1922  | -0.7679* | 0.1773  | -0.08777 | -0.6343* | -0.7643* | -0.4874* | -0.8296* | 0.7804*  | -0.2201  | 0.8994*  | 0.8617*  |
| NO <sub>2</sub>         |         |          | 0.6461*  | 0.8395*  | 0.08209 | 0.2940   | 0.8233*  | 0.9130*  | 0.7417*  | 0.8736*  | -0.7477* | -0.1149  | -0.5470* | -0.7165* |
| SO <sub>2</sub>         |         |          |          | 0.7323*  | 0.5233* | 0.6522*  | 0.8139*  | 0.9371*  | 0.8360*  | 0.4696*  | -0.1339  | -0.2805  | 0.03478  | -0.1699  |
| CO                      |         |          |          |          | 0.3354* | 0.5075*  | 0.8805*  | 0.8564*  | 0.8314*  | 0.8321*  | -0.6749* | -0.1086  | -0.5649* | -0.6080* |
| PM <sub>10</sub>        |         |          |          |          |         | 0.8977*  | 0.4501*  | -0.0331  | 0.2416   | 0.0732   | -0.01758 | -0.6426* | 0.3028*  | 0.3434*  |
| PM <sub>2.5</sub>       |         |          |          |          |         |          | 0.4643*  | 0.1609   | 0.4726*  | 0.1974   | -0.2098  | -0.6723* | 0.1269   | 0.1002   |
| EC in PM <sub>2.5</sub> |         |          |          |          |         |          |          | 0.8478*  | 0.8474*  | 0.8970*  | -0.6541* | -0.1020  | -0.4096* | -0.4890* |
| PNC                     |         |          |          |          |         |          |          |          | 0.7684*  | 0.8504*  | -0.8348* | -0.2165  | -0.6878* | -0.8260* |
| NMVOC                   |         |          |          |          |         |          |          |          |          | 0.6316*  | -0.2407  | -0.07776 | -0.3389* | -0.4689* |
| NO <sub>x</sub>         |         |          |          |          |         |          |          |          |          |          | -0.8510* | 0.02162  | -0.6690* | -0.7433* |
| T                       |         |          |          |          |         |          |          |          |          |          |          | 0.1169   | 0.6667*  | 0.6940*  |
| PREC                    |         |          |          |          |         |          |          |          |          |          |          |          | -0.3271* | -0.2132  |
| RAD                     |         |          |          |          |         |          |          |          |          |          |          |          |          | 0.8554*  |

\*:  $|r| > 0.3$ ; NA: not available.

Table 13. The P value of the co-occurrence of viruses and environmental factors in PM10

|             | O <sub>3</sub> | NO <sub>2</sub> | SO <sub>2</sub> | CO            | PM <sub>10</sub> | PM <sub>2.5</sub> | EC in PM <sub>2.5</sub> | PNC         | NMVO C       | NO <sub>x</sub> | T            | PREC       | RAD        | New COVID-19 Cases |
|-------------|----------------|-----------------|-----------------|---------------|------------------|-------------------|-------------------------|-------------|--------------|-----------------|--------------|------------|------------|--------------------|
| Influenza A | 1.3382E-02*    | 2.1487E-04***   | 1.0817E-02*     | 4.5663E-04*** | 4.3388E-01       | 7.5589E-02        | 1.0279E-04***           | 2.3124E-02* | 2.2091E-03** | 3.5947E-04***   | 5.8047E-03** | 6.8984E-01 | 1.8098E-01 | 1.7968E-02*        |

|             |             |             |               |            |            |            |             |             |               |              |              |              |             |              |
|-------------|-------------|-------------|---------------|------------|------------|------------|-------------|-------------|---------------|--------------|--------------|--------------|-------------|--------------|
| Influenza B | 5.7889E-01  | 5.5101E-01  | 2.6920E-01    | 6.3565E-01 | 1.3405E-01 | 8.4829E-02 | 3.6810E-01  | 8.8285E-01  | 3.6208E-01    | 3.3627E-01   | 9.4044E-01   | 6.8868E-03** | 7.3301E-01  | 2.3710E-01   |
| HCoV-NL63   | 5.8198E-02  | 1.3575E-02* | 4.9838E-01    | 5.8775E-02 | 8.6012E-01 | 8.3239E-01 | 1.0377E-02* | 4.2901E-02* | 1.6129E-01    | 5.4084E-03** | 1.5830E-01   | 4.3680E-01   | 2.7045E-01  | 2.5293E-02*  |
| HCoV-OC43   | 8.3572E-02  | 2.4483E-02* | 9.8323E-01    | 1.5498E-01 | 3.9084E-01 | 4.3635E-01 | 1.8844E-01  | 1.7719E-02* | 5.9930E-01    | 2.4483E-02*  | 6.0145E-02   | 5.6106E-01   | 1.2919E-01  | 4.5404E-02*  |
| HCoV-HKU1   | 4.5184E-02* | 2.6392E-02* | 1.1079E-01    | 7.3686E-02 | 9.1544E-01 | 8.9921E-01 | 1.2960E-01  | 8.1182E-01  | 6.0200E-03**  | 9.8712E-02   | 2.3973E-01   | 6.6902E-01   | 1.2378E-01  | 7.0745E-02   |
| HCoV-229E   | 3.5247E-02* | 2.7770E-02* | 2.2669E-02*   | 5.1620E-02 | 5.2074E-01 | 3.7366E-01 | 5.7142E-01  | 7.5570E-01  | 3.1387E-04*** | 3.6631E-01   | 2.8778E-01   | 9.9700E-01   | 1.9700E-02* | 5.7563E-03** |
| Enterovirus | 4.1994E-01  | 1.3858E-01  | 4.8908E-03**  | 8.7093E-02 | 7.4081E-01 | 7.9590E-02 | 5.0161E-01  | 7.3016E-01  | 4.4804E-03**  | 9.5428E-01   | 9.3273E-01   | 4.1246E-01   | 7.0556E-01  | 4.2569E-01   |
| Rhinovirus  | 2.6415E-01  | 1.0611E-01  | 4.1623E-01    | 2.1902E-01 | NA         | 5.8788E-01 | 7.2521E-01  | 9.7264E-02  | 5.8119E-01    | 3.0127E-01   | 1.7907E-02*  | 9.8779E-02   | 5.1065E-01  | 1.5354E-01   |
| HPIV1       | 4.7831E-01  | 1.9801E-01  | 2.2718E-01    | 9.2242E-02 | 9.4269E-02 | 9.2329E-02 | 9.2307E-02  | NA          | 1.7315E-01    | 1.9801E-01   | 4.2115E-01   | 3.6797E-01   | 7.4147E-01  | 5.6192E-01   |
| HPIV2       | NA          | NA          | NA            | NA         | NA         | NA         | NA          | NA          | NA            | NA           | NA           | NA           | NA          | NA           |
| HPIV3       | 8.4231E-01  | 7.8677E-01  | 1.7759E-01    | 4.3873E-01 | 2.4085E-01 | 2.8374E-01 | 5.8786E-01  | 4.9385E-01  | 1.9257E-01    | 7.8677E-01   | 5.3720E-01   | 7.4161E-01   | 7.8438E-01  | 4.4312E-01   |
| HPIV4       | 2.8759E-01  | 2.6777E-01  | 1.2337E-01    | 6.4772E-01 | 4.0655E-01 | 3.5619E-01 | 3.8935E-01  | 5.2729E-02  | 1.4296E-01    | 9.2188E-02   | 9.7681E-03** | 5.1503E-01   | 3.0388E-01  | 3.0018E-01   |
| HMPV        | 6.5403E-01  | 7.8198E-01  | 6.2393E-01    | 8.5811E-01 | 3.2051E-01 | 7.3929E-01 | 9.7025E-01  | 9.3633E-01  | 1.3027E-01    | 8.2289E-01   | 8.4231E-01   | 6.5963E-01   | 2.2893E-01  | 2.6073E-01   |
| SARS-CoV-2  | 4.8309E-01  | 3.2224E-01  | 1.4457E-04*** | 1.7999E-01 | 7.4477E-01 | 2.6588E-01 | 6.0156E-01  | 5.7348E-01  | 5.8230E-05*** | 8.1185E-01   | 2.7941E-01   | 5.8554E-01   | 6.0369E-01  | 2.7998E-01   |

|                         |               |               |               |             |               |               |               |               |               |               |               |               |               |
|-------------------------|---------------|---------------|---------------|-------------|---------------|---------------|---------------|---------------|---------------|---------------|---------------|---------------|---------------|
| O <sub>3</sub>          | 2.3554E-07*** | 3.6832E-01    | 4.6035E-08*** | 3.4858E-01  | 6.1072E-01    | 3.2692E-05*** | 1.3735E-05*** | 1.5689E-02**  | 4.0163E-10*** | 1.9892E-08*** | 1.9708E-01    | 9.1187E-14*** | 1.4951E-11*** |
| NO <sub>2</sub>         |               | 6.4835E-04*** | 1.5788E-10*** | 6.6628E-01  | 8.1835E-02    | 7.0416E-10*** | 4.9324E-10*** | 3.3620E-05*** | 3.5672E-12*** | 1.5978E-07*** | 5.0443E-01    | 5.5651E-04*** | 8.8769E-07*** |
| SO <sub>2</sub>         |               |               | 4.7320E-05*** | 1.7893E-02* | 5.5353E-04*** | 1.3124E-06*** | 6.9932E-06*** | 3.6475E-07*** | 2.0610E-02**  | 5.3274E-01    | 1.8430E-01    | 8.7182E-01    | 4.2736E-01    |
| CO                      |               |               |               | 7.0026E-02  | 1.5826E-03**  | 1.4492E-12*** | 9.3525E-08*** | 4.8408E-07*** | 3.1793E-10*** | 6.3316E-06*** | 5.2838E-01    | 3.3166E-04*** | 8.3886E-05*** |
| PM <sub>10</sub>        |               |               |               |             | 1.7923E-11*** | 1.2579E-02*   | 8.8988E-01    | 3.0479E-01    | 7.0070E-01    | 9.2656E-01    | 1.2882E-04*** | 1.0387E-01    | 6.3192E-02    |
| PM <sub>2.5</sub>       |               |               |               |             |               | 4.3411E-03**  | 4.5269E-01    | 1.9697E-02*   | 2.4844E-01    | 2.1945E-01    | 7.1041E-06*** | 4.6081E-01    | 5.6099E-01    |
| EC in PM <sub>2.5</sub> |               |               |               |             |               |               | 1.6970E-07*** | 1.7515E-07*** | 1.3330E-13*** | 1.5143E-05*** | 5.5408E-01    | 1.3121E-02*   | 2.4727E-03**  |
| PNC                     |               |               |               |             |               |               |               | 3.5018E-03**  | 1.4211E-07*** | 3.9327E-07*** | 3.0952E-01    | 2.0367E-04*** | 6.6719E-07*** |
| NMVOC                   |               |               |               |             |               |               |               |               | 9.3246E-04*** | 2.5729E-01    | 7.1797E-01    | 1.0519E-01    | 2.0815E-02*   |
| NO <sub>x</sub>         |               |               |               |             |               |               |               |               |               | 4.9008E-11*** | 9.0038E-01    | 8.1824E-06*** | 2.0726E-07*** |
| T                       |               |               |               |             |               |               |               |               |               |               | 4.9724E-01    | 9.0252E-06*** | 2.6832E-06*** |
| PREC                    |               |               |               |             |               |               |               |               |               |               |               | 5.1525E-02    | 2.1187E-01    |
| RAD                     |               |               |               |             |               |               |               |               |               |               |               |               | 3.0389E-11*** |

\*: P<0.05; \*\*: P<0.01; \*\*\*: P<0.001; NA: not available.

# Supplementary Figure

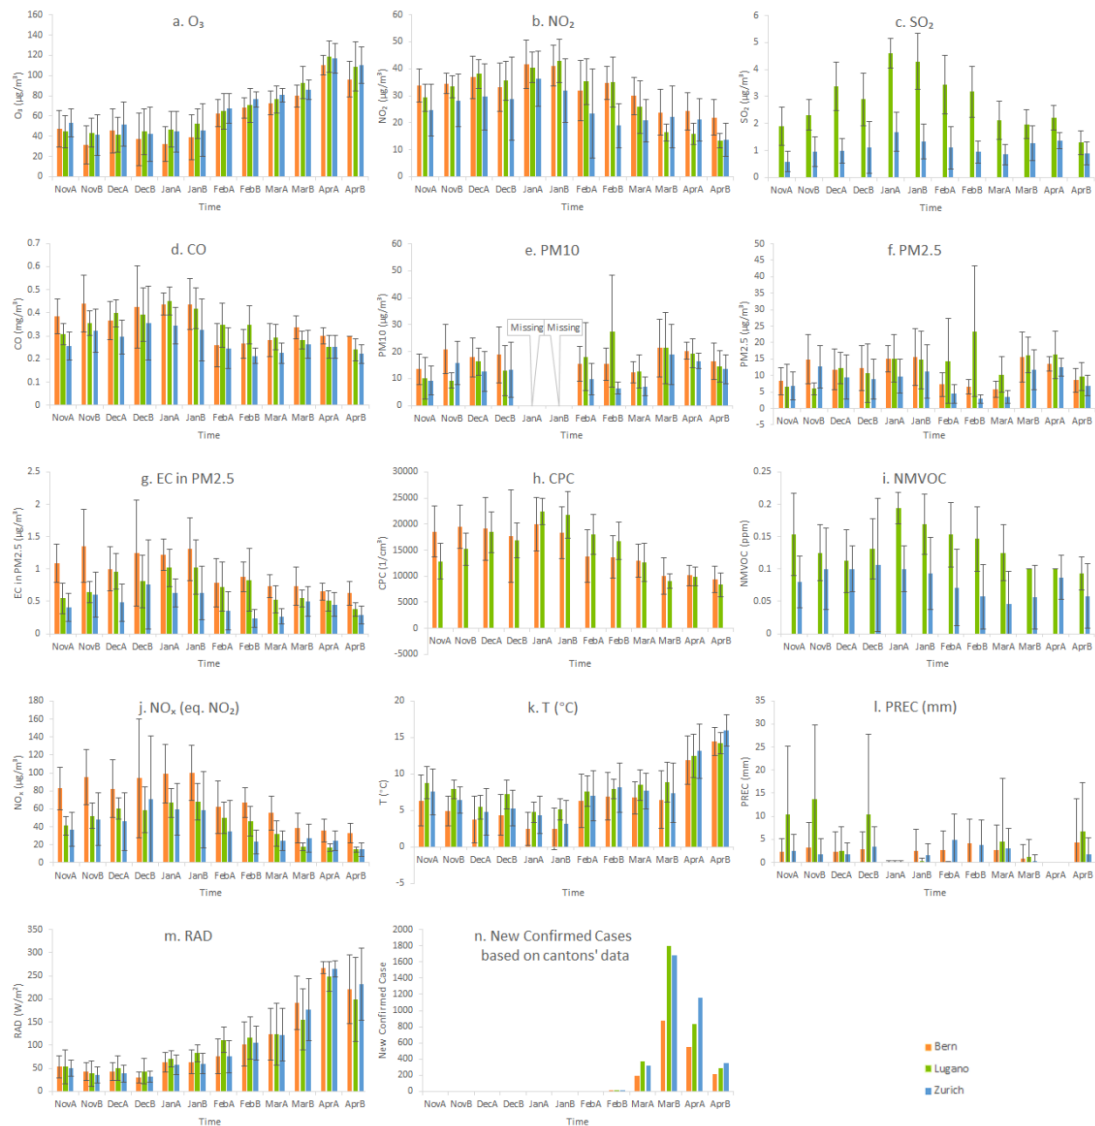

Fig. 1 The temporal variations of air environmental factors in three cities

## Reference

1. WHO. *CDC protocol of realtime RTPCR for swine influenza A(H1N1)*. 2009; Available from: [http://www.who.int/csr/resources/publications/swineflu/CDCrealtimeRTPCRprotocol\\_20090428.pdf](http://www.who.int/csr/resources/publications/swineflu/CDCrealtimeRTPCRprotocol_20090428.pdf).
2. Selvaraju, S.B. and R. Selvarangan, *Evaluation of three influenza A and B real-time reverse transcription-PCR assays and a new 2009 H1N1 assay for detection of influenza viruses*. J Clin Microbiol, 2010. **48**(11): p. 3870-5.
3. Loens, K., et al., *Performance of different mono- and multiplex nucleic acid amplification*



- tests on a multipathogen external quality assessment panel.* J Clin Microbiol, 2012. **50**(3): p. 977-87.
4. Suo, T., et al., *ddPCR: a more accurate tool for SARS-CoV-2 detection in low viral load specimens.* Emerg Microbes Infect, 2020. **9**(1): p. 1259-1268.
  5. van Elden, L.J., et al., *Applicability of a real-time quantitative PCR assay for diagnosis of respiratory syncytial virus infection in immunocompromised adults.* J Clin Microbiol, 2003. **41**(9): p. 4378-81.
  6. Watanabe, T., et al., *Dose-response assessment for influenza A virus based on data sets of infection with its live attenuated reassortants.* Risk Anal, 2012. **32**(3): p. 555-65.
  7. Xie, C., et al., *Detection of Influenza and Other Respiratory Viruses in Air Sampled From a University Campus: A Longitudinal Study.* Clin Infect Dis, 2020. **70**(5): p. 850-858.
  8. Peduru Hewa, T.M., et al., *The detection of influenza A and B viruses in clinical specimens using a quartz crystal microbalance.* J Virol Methods, 2009. **162**(1-2): p. 14-21.
  9. Kim, H.R., S. An, and J. Hwang, *An integrated system of air sampling and simultaneous enrichment for rapid biosensing of airborne coronavirus and influenza virus.* Biosens Bioelectron, 2020. **170**: p. 112656.
  10. Thompson, K.A. and A.M. Bennett, *Persistence of influenza on surfaces.* J Hosp Infect, 2017. **95**(2): p. 194-199.
  11. Yang, W., S. Elankumaran, and L.C. Marr, *Concentrations and size distributions of airborne influenza A viruses measured indoors at a health centre, a day-care centre and on aeroplanes.* Journal of the Royal Society Interface, 2011. **8**(61): p. 1176-1184.
  12. Pourianfar, H.R., A. Javadi, and L. Grollo, *A colorimetric-based accurate method for the determination of enterovirus 71 titer.* Indian J Virol, 2012. **23**(3): p. 303-10.
  13. Watanabe, T., et al., *Development of a dose-response model for SARS coronavirus.* Risk Anal, 2010. **30**(7): p. 1129-38.
  14. Lednicky, J.A., et al., *Viable SARS-CoV-2 in the air of a hospital room with COVID-19 patients.* International Journal of Infectious Diseases, 2020. **100**: p. 476-482.
  15. Ang, A.X., et al., *Airborne SARS-CoV-2 surveillance in hospital environment using high-flowrate air samplers and its comparison to surface sampling.* Indoor Air, 2021.
  16. Dumont-Leblond, N., et al., *Low incidence of airborne SARS-CoV-2 in acute care hospital rooms with optimized ventilation.* Emerg Microbes Infect, 2020. **9**(1): p. 2597-2605.
  17. Lednicky, J.A., et al., *Collection of SARS-CoV-2 Virus from the Air of a Clinic within a University Student Health Care Center and Analyses of the Viral Genomic Sequence.* Aerosol and Air Quality Research, 2020. **20**(6): p. 1167-1171.
  18. Nannu Shankar, S., et al., *SARS-CoV-2 in residential rooms of two self-isolating persons with COVID-19.* J Aerosol Sci, 2022. **159**: p. 105870.
  19. Lednicky, J.A., et al., *Isolation of SARS-CoV-2 from the air in a car driven by a COVID patient with mild illness.* Int J Infect Dis, 2021. **108**: p. 212-216.
  20. Sampath, R., et al., *Rapid identification of emerging pathogens: Coronavirus.* Emerging Infectious Diseases, 2005. **11**(3): p. 373-379.
